# Supplementary material for: A Quantitative Study of the Hog1 MAPK Response to Fluctuating Osmotic Stress in Saccharomyces cerevisiae
Source: PLoS One. 2010 Mar 4;5(3):e9522. doi: 10.1371/journal.pone.0009522 (PMC2831999; doi:10.1371/journal.pone.0009522)
Supplement: Table S3 — Complete list of ordinary differential equations and other equations. (0.10 MB DOC) [file pone.0009522.s013.doc]

**Table S3. Complete list of ordinary differential equations and other equations**

|  |  | (1) |
| --- | --- | --- |
|  |  | (2) |
|  |  | (3) |
|  |  | (4) |
|  |  | (5) |
|  |  | (6) |
|  |  | (7) |
|  |  | (8) |

**Table S3 (Continued)**

|  |  | (9) |
| --- | --- | --- |
|  |  | (10) |
|  |  | (11) |
|  |  | (12) |
|  |  | (13) |
|  |  | (14) |
|  |  | (15) |
|  |  | (16) |
|  |  | (17) |
|  |  | (18) |
|  |  | (19) |
|  |  | (20) |

**Table S3 (Continued)**

|  |  | (21) |
| --- | --- | --- |
|  | (note: [*Hog*1*n*] and [*Hog*1*PPn*] have unit of 10-6 M; *Vcell* has unit of 10-15 L) | (22) |
